CORRECTION

## Correction: Design of field trials for the evaluation of transmissible vaccines in animal populations

The *PLOS Computational Biology* Staff

In the Estimation of causal protection subsection of the Methods, there is an error in the first equation in the second term and the following text below the equation. The  $f(\alpha)$  should read as  $\phi(\alpha)$ . Please view the complete, correct equations here:

$$\Delta_1(\alpha) = \bar{Y}(\psi(\alpha)) - \bar{Y}(\phi(\alpha))$$

$$\bar{Y}_i(\psi(\alpha)) - \bar{Y}_i(\phi(\alpha))$$

The publisher apologizes for the errors.

### Reference

1. Sheen JK, Kennedy-Shaffer L, Levy MZ, Metcalf CJE. Design of field trials for the evaluation of transmissible vaccines in animal populations. *PLoS Comput Biol*. 2025;21(2):e1012779. <https://doi.org/10.1371/journal.pcbi.1012779> PMID: [39899630](https://pubmed.ncbi.nlm.nih.gov/39899630/)

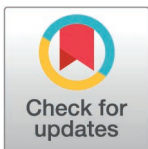

### OPEN ACCESS

**Citation:** The *PLOS Computational Biology* Staff (2025) Correction: Design of field trials for the evaluation of transmissible vaccines in animal populations. *PLoS Comput Biol* 21(9): e1013530. <https://doi.org/10.1371/journal.pcbi.1013530>

**Published:** September 26, 2025

**Copyright:** © 2025 The *PLOS Computational Biology* Staff. This is an open access article distributed under the terms of the [Creative Commons Attribution License](https://creativecommons.org/licenses/by/4.0/), which permits unrestricted use, distribution, and reproduction in any medium, provided the original author and source are credited.
